# Supplementary material for: Impact of buildings on surface solar radiation over urban Beijing
Source: Copernicus journal article supplement (doi:10.5194/acp-2016-3), 2016-01-29
Supplement: Supplementary file [file acp-2016-3-AC2-supplement.zip]

# 1 Impact of buildings on surface solar radiation over urban 2 Beijing

3 B. Zhao<sup>1</sup>, K. N. Liou<sup>1</sup>, Y. Gu<sup>1</sup>, C. He<sup>1</sup>, W. L. Lee<sup>2</sup>, X. Chang<sup>3</sup>, Q. B. Li<sup>1</sup>, S. X. Wang<sup>3</sup>,  
4 H. R. Tseng<sup>1</sup>, L. R. Leung<sup>5</sup>, J. M. Hao<sup>3, 4</sup>

5 [1] Joint Institute for Regional Earth System Science and Engineering and Department of  
6 Atmospheric and Oceanic Sciences, University of California, Los Angeles, CA 90095, USA

7 [2] Research Center for Environmental Changes, Academia Sinica, Taipei, Taiwan

8 [3] State Key Joint Laboratory of Environment Simulation and Pollution Control, School of  
9 Environment, Tsinghua University, Beijing 100084, China

10 [4] State Environmental Protection Key Laboratory of Sources and Control of Air Pollution  
11 Complex, Beijing 100084, China

12 [5] Pacific Northwest National Laboratory, Richland, WA 99352, USA

13  
14 Correspondence to: B. Zhao [zhaob1206@gmail.com]

## 15 16 **Abstract.**

17 The rugged surface of an urban area due to varying buildings can interact with solar beams  
18 and affect both the magnitude and spatiotemporal distribution of surface solar fluxes. Here we  
19 systematically examine the impact of buildings on downward surface solar fluxes over urban  
20 Beijing by using a 3-D radiation parameterization that accounts for 3-D building structures  
21 versus the conventional plane-parallel scheme. We find that the resulting downward surface  
22 solar flux deviations between the 3-D and the plane-parallel schemes are generally  $\pm 1$ –  
23  $10 \text{ W m}^{-2}$  at 800-m grid resolution and within  $\pm 1 \text{ W m}^{-2}$  at 4-km resolution. Pairs of positive-  
24 negative flux deviations on different sides of buildings are resolved at 800-m resolution, while  
25 they offset each other at 4-km resolution. Flux deviations from the unobstructed horizontal  
26 surface at 4-km resolution are positive around noon but negative in the early morning and late  
27 afternoon. The corresponding deviations at 800-m resolution, in contrast, show diurnal  
28 variations that are strongly dependent on the location of the grids relative to the buildings.  
29 Both the magnitude and spatiotemporal variations of flux deviations are largely dominated by  
30 the direct flux. Furthermore, we find that flux deviations can potentially be an order of  
31 magnitude larger by using a finer grid resolution. Atmospheric aerosols can reduce the

1 magnitude of downward surface solar flux deviations by 10–65%, while the surface albedo  
2 generally has a rather moderate impact on flux deviations. The results imply that the effect of  
3 buildings on downward surface solar fluxes may not be critically significant in mesoscale  
4 atmospheric models with a grid resolution of 4 km or coarser. However, the effect can play a  
5 crucial role in meso-urban atmospheric models as well as microscale urban dispersion models  
6 with resolutions of 1 m – 1 km.

7

## 8 **1 Introduction**

9 The spatial orientation and inhomogeneous features of the earth’s surface interact with direct  
10 and diffuse solar beams in an intricate manner (Liou et al., 2013). In particular, the complex  
11 and rugged surface of an urban area due to varying buildings can interact with solar beams  
12 and affect both the magnitude and spatiotemporal distribution of surface solar fluxes. The  
13 distribution of solar fluxes can significantly modulate surface heating and moistening,  
14 evapotranspiration, land-atmosphere interaction, boundary layer, and air pollutant dispersion  
15 (Lee et al., 2011; Gu et al., 2012). It is very difficult to accurately quantify the surface solar  
16 flux distribution in view of the complexity of spatial orientation and surface optical properties,  
17 especially over urban areas.

18 Several approaches with varying degrees of sophistication have been developed to evaluate  
19 solar fluxes at rugged surface (Dozier and Frew, 1990; Dubayah et al., 1990; Chen et al., 2006;  
20 Essery and Marks, 2007; Lai et al., 2010). Among these approaches, the 3-D Monte Carlo  
21 photon tracing approach gives the most physically-representative radiative transfer  
22 calculations for an environment with complex 3-D topography. Chen et al. (2006) and Liou et  
23 al. (2007) developed a Monte Carlo program and found that the domain-average downward  
24 surface solar fluxes with rugged topography deviate from the unobstructed horizontal surface  
25 by 10–50 W m<sup>-2</sup> over the Tibetan Plateau and can be as large as 600 W m<sup>-2</sup> locally over  
26 shaded areas. The 3-D Monte Carlo approach has also been used to evaluate interactions  
27 between solar beams and other irregular surfaces, such as wind-blown sea surfaces and plant  
28 canopies (Preisendorfer and Mobley, 1986; Iwabuchi and Kobayashi, 2008; Mayer et al.,  
29 2010). However, a drawback of the 3-D Monte Carlo photon tracing approach is the enormous  
30 computational burden. To overcome this drawback, Lee et al. (2011, 2013) developed a  
31 parameterization of downward solar fluxes associated with topographic information based on  
32 3-D Monte Carlo simulations. The parameterization was subsequently implemented in

1 regional and global weather and climate models (Liou et al., 2013; Lee et al., 2015; Gu et al.,  
2 2012) in which the effects of 3-D mountainous topography on sensible and latent heat fluxes,  
3 surface hydrology, and cloud properties have been investigated and evaluated.

4 With the objective to improve the urban representation in land-surface schemes that has  
5 been used in numerical models, a number of urban energy balance models (or urban canopy  
6 models) have been developed, as reviewed by Grimmond et al. (2010, 2011). Some of these  
7 models have considered a building's shading effect and the reflectance of solar beams by  
8 building walls (Kusaka et al., 2001; Kusaka and Kimura, 2004; Kondo et al., 2005; Oleson et  
9 al., 2008). However, these models have at least two drawbacks. First, the 3-D radiative  
10 transfer was calculated based on simplified, evenly spaced buildings, rather than "real"  
11 buildings. Second, the diffuse, diffuse-reflected, and coupled fluxes (e.g., multiple reflections)  
12 were often oversimplified, resulting in noticeable errors due to the distinct features of the  
13 different flux components. A systematic evaluation and physical understanding of the 3-D  
14 building effect on surface solar radiation over urban areas is imperative.

15 In this study, we investigate the impact of buildings on downward surface solar fluxes over  
16 urban Beijing, the capital and one of the largest megacities in China. The evaluation is  
17 conducted using the 3-D radiation parameterization developed by Lee et al. (2013) coupled  
18 with the Fu-Liou-Gu (FLG) plane-parallel radiative transfer scheme (Fu and Liou, 1992; Gu  
19 et al., 2003; Gu et al., 2006). In Section 2, we describe the parameterization of 3-D  
20 topography effect on downward solar fluxes and its application over urban Beijing. In Section  
21 3, we investigate the magnitude and spatiotemporal variation of deviations in downward  
22 surface solar fluxes induced by buildings and evaluate the effect of key factors by means of  
23 sensitivity simulations. Conclusions and implications are given in Section 4.

## 24 **2 Methodology and data source**

### 25 **2.1 Parameterization of the 3-D topography effect on downward surface solar** 26 **fluxes**

27 In order to evaluate the impact of buildings on downward surface solar radiation, we apply the  
28 3-D radiation parameterization over rugged surface developed by Lee et al. (2013). Below are  
29 key points of the parameterization. Note that we focus exclusively on "downward" solar  
30 fluxes in this study.

1 Solar radiative fluxes can be categorized into five components according to photon path: (1)  
 2 direct flux ( $F_{dir}$ ) is composed of photons hitting the ground directly from the sun without  
 3 encountering scattering or reflection; (2) diffuse flux ( $F_{dif}$ ) contains photons experiencing  
 4 single or multiple scattering by air molecules, but does not encounter surface reflection; (3)  
 5 direct-reflected flux ( $F_{rdir}$ ) is comprised of unscattered photons reflected by nearby terrain;  
 6 (4) diffuse-reflected flux ( $F_{rdif}$ ) means that photon is first scattered by air molecules and then  
 7 reflected by nearby terrain; and (5) coupled flux ( $F_{coup}$ ) represents photons that after being  
 8 reflected by the surface, encounter scattering and/or one or more additional surface  
 9 reflections.

10 Conventional plane-parallel radiative transfer schemes have already been developed to  
 11 calculate solar fluxes on a horizontal surface, so the purpose of the 3-D radiation  
 12 parameterization is to produce relative deviations of these five flux components from those of  
 13 an unobstructed horizontal surface. On the basis of 3-D Monte Carlo photon tracing  
 14 simulations, Lee et al. (2011, 2013) utilized a multiple linear regression technique to establish  
 15 the relationship between deviations in solar fluxes (response variables) and subgrid scale  
 16 topographic information (independent variables). The Shuttle Radar Topography Mission  
 17 (SRTM) topography data (Jarvis et al., 2008) at a resolution of 3 arc-second (about 90 m)  
 18 were used to perform 3-D Monte Carlo simulations for many  $10 \times 10$  km<sup>2</sup> rugged domains in  
 19 the Sierra Nevada Mountain area, which were subsequently used to develop regression  
 20 parameterization. Although the parameterization was developed in the Sierra Nevada area, it  
 21 is applicable to other regions because it is topographic parameter-dependent rather than  
 22 location-dependent. The regression equations for flux deviations in clear-sky condition can be  
 23 expressed by

$$\begin{matrix} 24 \\ 25 \\ 26 \end{matrix}
 \begin{pmatrix} F'_{dir} \\ F'_{dif} \\ F'_{rdir} \\ F'_{rdif} \\ F'_{coup} \end{pmatrix} = \begin{pmatrix} a_1 \\ a_2 \\ a_3 \\ a_4 \\ a_5 \end{pmatrix} + \begin{pmatrix} b_{11} & b_{12} & 0 & 0 \\ b_{21} & b_{22} & 0 & b_{24} \\ 0 & b_{32} & b_{33} & 0 \\ 0 & b_{42} & b_{43} & 0 \\ b_{51} & b_{52} & b_{53} & 0 \end{pmatrix} \begin{pmatrix} \langle \tilde{\mu}_i \rangle \\ \langle \tilde{V}_d \rangle \\ \langle \tilde{C}_t \rangle \\ \sigma(h) \end{pmatrix} \quad (1)$$

where  $F'_i$  is the relative deviation of each flux component,  $i = dir, dif, rdir, rdif, \text{ and } coup$ .  $a_i$   
 is the interception,  $b_{ij}$  is the regression coefficient for a specific independent variable.  $\tilde{\mu}_i$  is

1 the cosine of the solar zenith angle normalized by the cosine of the slope,  $\tilde{V}_d$  is the sky view  
2 factor normalized by the cosine of the slope,  $\tilde{C}_t$  is the terrain configuration factor normalized  
3 by the cosine of the slope,  $\sigma(h)$  is the standard deviation of elevation, and angle brackets  
4 denote the spatial mean of the variable within a  $10 \times 10 \text{ km}^2$  domain. Lee et al. (2013)  
5 demonstrated that the flux components predicted by these regression equations agree well  
6 with those directly calculated from Monte Carlo simulations.

## 7 **2.2 Application of the 3-D radiation parameterization to urban Beijing**

8 We apply the parameterization described above to Beijing, a megacity with numerous  
9 buildings, many of which are skyscrapers. Two domains with different sizes and resolutions  
10 are used (Fig. 1). Domain 1 covers urban and suburban Beijing at a grid resolution of 4 km,  
11 which is a commonly used resolution in mesoscale atmospheric models. The Xishan mountain  
12 is located in the northwestern part of the domain, serving as a comparison of the 3-D  
13 topography effect over mountainous and urban areas. The rest of the domain is characterized  
14 by plains with typical urban landscape (e.g., buildings and roads). Domain 2 covers the urban  
15 center of Beijing at 800-m resolution, corresponding to the typical resolution of meso-urban  
16 models.

17 Following Lee et al. (2013), we use topography data at a resolution of 3 arc-second (about  
18 90 m) from the SRTM, which provides the elevation of each 90-m pixel (see right panel of  
19 Figure 1). The SRTM data mimic buildings as numerous  $90 \times 90 \text{ m}^2$  cuboids. They define the  
20 overall heights, widths, and intervals of large buildings, but can not resolve detailed geometry  
21 of buildings. Using the SRTM data, we first calculate topographical parameters (described in  
22 Section 2.1) for each 90-m pixel following the method described in Lee et al. (2011), followed  
23 by evaluating the average topographical parameters for each 4-km or 800-m grid in simulation  
24 domains. The SRTM data is for the year 2000. We note that urban development in Beijing has  
25 expanded greatly since 2000, far beyond what is represented in the SRTM data. This study  
26 aims to assess the potential magnitude of the effect of buildings on solar fluxes; the SRTM  
27 data meet the need considering that there were already numerous buildings in Beijing in 2000.

28 The 3-D radiation parameterization was originally developed for  $10 \times 10 \text{ km}^2$  grids. Lee et al.  
29 (2011, 2013) demonstrated its compatibility across various resolutions. Theoretically it is  
30 applicable to a grid resolution as fine as 800 m since an  $800 \times 800 \text{ m}^2$  grid encompasses a large  
31 number of 90-m pixels. Here we further demonstrate the compatibility associated with

1 resolutions by comparing flux deviations in each  $4\times 4\text{ km}^2$  grid calculated directly from the 3-  
2 D parameterization and those from the summation of all  $800\times 800\text{ m}^2$  grids. We find the biases  
3 between the two are within  $\pm 0.025\text{ W m}^{-2}$ , indicating a reasonable compatibility between  
4 different grid resolutions. The calculation method and subsequent results are described in  
5 detail in the Supplementary Material.

6 The 3-D radiation parameterization is used in conjunction with the FLG plane-parallel  
7 radiation scheme (Fu and Liou, 1992; Gu et al., 2003; Gu et al., 2006; Gu et al., 2010), which  
8 calculates solar fluxes on flat surfaces. The FLG scheme combines the delta-four-stream  
9 approximation for solar flux calculations with the delta-two/four-stream approximation for  
10 infrared flux calculations to assure both accuracy and efficiency. The solar ( $0\text{--}5\mu\text{m}$ ) and  
11 infrared ( $5\text{--}50\mu\text{m}$ ) spectra are divided into 6 and 12 bands, respectively, within which the  
12 correlated k-distribution method is used to sort gaseous absorption lines. The single-scattering  
13 properties of 18 aerosol types are parameterized by employing the Optical Properties of  
14 Aerosols and Clouds (OPAC) database.

15 The meteorological and chemical variables (i.e., air temperature, surface temperature,  
16 pressure, humidity, surface albedo, ozone concentrations, and aerosol optical depth) used in  
17 the FLG scheme are derived from a simulation of the Weather Research and Forecasting  
18 model (WRF, version 3.3)/Community Multi-scale Air Quality model (CMAQ, version 5.0.2).  
19 For the WRF/CMAQ simulation, we apply one-way, triple nesting domains with resolutions  
20 of 36 km, 12 km, and 4 km, respectively (Fig. S1). We use a high-resolution anthropogenic  
21 emission inventory developed by Tsinghua University for the Beijing-Tianjin-Hebei region  
22 (i.e., regions within the innermost domain) and a regional anthropogenic emission inventory  
23 for other regions in China (Zhao et al., 2013a, b; Wang et al., 2014). The WRF/CMAQ  
24 simulation used the Pleim-Xiu land surface model, in which the building effect on solar  
25 radiation is not accounted for (Pleim and Xiu, 1995). The conversion of vertically resolved  
26 aerosol mass concentrations to aerosol optical depth follows Heald (2010) and Martin and  
27 Heald (2010). The simulated meteorological parameters and concentrations of fine particles  
28 ( $\text{PM}_{2.5}$ ) and their chemical components are in reasonable agreement with observations (Table  
29 S2, Fig. S2). The configuration of WRF/CMAQ and its evaluation against observations are  
30 described in detail in the Supplementary Material. The meteorological and chemical variables  
31 of Domain 1 (4-km resolution) are taken from the WRF/CMAQ simulation directly, while the

1 variables in Domain 2 (800-m resolution) are assumed to be the same as their corresponding  
2 values at the 4 km grids.

3 The 3-D radiative transfer calculations are for January 1<sup>st</sup>, April 1<sup>st</sup>, July 1<sup>st</sup>, and October 1<sup>st</sup>,  
4 2012, representing four seasons. Within each day, the calculation is done every hour starting  
5 from 0:00, Beijing Time (BT). To avoid the fluctuation of atmospheric profiles, we conduct  
6 the WRF/CMAQ simulations for four months (January, April, July, and October) and use  
7 monthly average meteorological and chemical variables for each of the 24 hours in the 3-D  
8 radiative transfer calculations. For example, for the simulation of January 1<sup>st</sup> 0:00 BT, we use  
9 the average temperature at 0:00 BT of each day in January.

10 We conduct radiative transfer computation primarily for clear-sky condition without  
11 aerosols, for which the 3-D radiation parameterization was developed. We also incorporate  
12 aerosols for a sensitivity scenario (see Section 3.3.1). In the presence of aerosols, regression  
13 equations for  $F'_{dir}$  and  $F'_{rdif}$  can be directly applied because these two components do not  
14 encounter scattering. As for  $F'_{dif}$ ,  $F'_{rdif}$ , and  $F'_{coup}$ , the parameterization provides a first-order  
15 estimate (Lee et al., 2013; Lee et al., 2011). Considering that the direct flux usually dominates  
16 over other components (Chen et al., 2006; Lee et al., 2011), the parameterization is likely  
17 applicable in an environment with a large aerosol loading.

### 18 **3 Results and discussion**

#### 19 **3.1 Deviations in solar fluxes from horizontal surface**

20 We calculate surface solar fluxes at rugged city surface by employing the 3-D radiation  
21 parameterization coupled with the FLG plane-parallel scheme. Surface solar flux deviations  
22 between the 3-D radiation parameterization and plane-parallel scheme represent the effect of  
23 buildings. Figure 2 (top three rows) shows hourly flux deviations at selected times (7:00,  
24 12:00, and 17:00 BT) on April 1<sup>st</sup> in clear-sky condition without aerosols. Figure 3 depicts  
25 daily average flux deviations for four simulation days (January 1<sup>st</sup>, April 1<sup>st</sup>, July 1<sup>st</sup>, and  
26 October 1<sup>st</sup>). For Domain 1 (4-km resolution), a striking feature is that deviations over urban  
27 areas are remarkably smaller than those over mountainous areas. Both hourly and daily  
28 average deviations over urban areas are generally within  $\pm 1 \text{ W m}^{-2}$ . In contrast, hourly/daily  
29 average deviations over mountainous areas are on the order of  $\pm 10\text{--}70 \text{ W m}^{-2}$ , except for July  
30 when daily average deviations are generally within  $10 \text{ W m}^{-2}$ . The maximum local deviations  
31 can be up to  $\pm 100 \text{ W m}^{-2}$ . In Domain 2 (800-m resolution), both the magnitude and the spatial

1 pattern of deviations differ greatly from Domain 1. Flux deviations usually range between  $\pm 1$ –  
2  $10 \text{ W m}^{-2}$ . The magnitude of flux deviations has a significant seasonal variation associated  
3 with the position of the sun in different seasons. For example, daily average flux deviations  
4 are within  $\pm 10 \text{ W m}^{-2}$ ,  $\pm 6 \text{ W m}^{-2}$ , and  $\pm 1 \text{ W m}^{-2}$  in January, April/October, and July,  
5 respectively. Smaller daily average deviations in July are attributable to the smaller shading  
6 effect at the north-south direction as the sun is close to its zenith at noon. In addition, the fine  
7 structure of positive-negative pairs on southern-northern or eastern-western sides of buildings  
8 is resolved in Domain 2. This phenomenon is especially pronounced when we compare flux  
9 deviations at 7:00 BT and 17:00 BT. Many grids show opposite-sign flux deviations at these  
10 two times, implying that they are located on the opposite side of buildings. The spatial pattern  
11 comprising of positive-negative pairs is somewhat similar to that of mountainous areas in  
12 Domain 1. By comparing Domain 1 and Domain 2, we conclude that flux deviations from the  
13 flat surface over urban areas are quite sensitive to grid resolution. The magnitude of  
14 deviations is small at a coarse resolution such as 4 km, because of the offset of positive and  
15 negative deviations.

16 We further analyze the diurnal variation of flux deviations from the horizontal surface, as  
17 shown in Fig. 4. To facilitate the analysis, we select a typical mountainous area (defined as  
18 rectangle A in Fig. 1) and a typical urban area (defined as rectangle B in Fig. 1) in Domain 1,  
19 as well as a typical urban area (defined as rectangle C in Fig. 1) in Domain 2. Flux deviations  
20 in the typical urban area defined in Domain 1 (Fig. 4b) are positive during 6–7 hours around  
21 noon with peaks occurring at noon, while they are negative in the early morning and late  
22 afternoon. This diurnal pattern persists on all simulation days. At noon, buildings generally  
23 receive more solar energy than a flat surface due to a larger surface area facing the sun,  
24 whereas negative deviations in the early morning and late afternoon are primarily induced by  
25 larger shading areas. The diurnal pattern over the typical urban area defined in Domain 2 (Fig.  
26 4c) substantially differs from the preceding pattern such that flux deviations are positive in the  
27 morning and negative in the afternoon. Figure 1 shows that the typical urban area defined in  
28 Domain 2 (i.e., rectangle C) is mostly located in the eastern side of the buildings rather than in  
29 the western side. In this case, the eastern side faces the sun in the morning, receiving more  
30 solar fluxes than its horizontal surface counterpart. In the afternoon, the eastern side is shaded  
31 by the buildings to substantially block solar beam. We note that the diurnal variation of grids  
32 in Domain 2 is a strong function of their relative locations to the buildings. For example, the



1 diurnal pattern is exactly opposite for a grid containing more buildings' western side.  
2 Furthermore, it is noticeable that the diurnal pattern of the typical urban area defined in  
3 Domain 2 highly resembles that of the typical mountainous area defined in Domain 1 (Fig.  
4 4a), which is located on the eastern side of the Xishan mountain. This reveals the similarity  
5 between buildings and mountains in terms of their impacts on surface radiation, though they  
6 are associated with different spatial scales – 4 km or more for mountains (Liou et al., 2013;  
7 Lee et al., 2013), and 800 m or less for buildings.

### 8 **3.2 Contribution of individual flux components to flux deviations**

9 We quantify the contribution of individual flux components to surface solar flux deviations  
10 between 3-D and plane-parallel in order to gain a deeper understanding of the effect of  
11 buildings on solar flux distributions. Figure 5 shows the contribution of individual  
12 components to flux deviations on April 1<sup>st</sup> in the three typical areas defined in the last section,  
13 while Fig. S3 depicts the corresponding contributions on four simulation days (January 1<sup>st</sup>,  
14 April 1<sup>st</sup>, July 1<sup>st</sup>, and October 1<sup>st</sup>) in the typical urban area defined in Domain 1. For the other  
15 two typical areas, only April 1<sup>st</sup> is shown because the other simulation days present very  
16 similar patterns. As described in Section 2.1, solar fluxes are physically categorized into five  
17 components, including direct flux, diffuse flux, direct-reflected flux, diffuse-reflected flux,  
18 and coupled flux. In Fig. 5, diffuse and coupled fluxes are merged together, considering that  
19 the coupled flux is usually negligible and that these two components are treated together in the  
20 plane-parallel scheme. A striking pattern is that the direct flux largely dominates deviations  
21 from the unobstructed horizontal surface over both urban and mountainous areas. The diurnal  
22 variation of direct flux is very similar to that of the total flux, which has been illustrated in  
23 detail in the last section. In general, deviations in diffuse flux (plus coupled flux) are negative  
24 over both urban and mountainous areas since sky view factors are less than 1.0 in street  
25 canyons or valleys. Their magnitude is generally between  $-0.03 \text{ W m}^{-2}$  and  $-0.10 \text{ W m}^{-2}$  in  
26 typical urban areas in Domain 1 (Fig. 5b, Fig. S3) and between  $-0.10 \text{ W m}^{-2}$  and  $-0.25 \text{ W m}^{-2}$   
27 in typical urban areas in Domain 2 (Fig. 5c), both peaking at noon. Deviations in direct-  
28 reflected and diffuse-reflected fluxes are always positive because these two components do  
29 not exist on unobstructed horizontal surfaces. The magnitude of direct-reflected flux ranges  
30 between  $0.01\text{--}0.20 \text{ W m}^{-2}$  in typical urban areas (both Domain 1 and Domain 2), with peaks  
31 occurring at summer noon. Figure S3 shows that deviations in the direct-reflected flux can

1 exceed those of the direct flux for a few hours around summer noon. The magnitude of the  
2 diffuse-reflected flux is always negligible compared with the components described above.

### 3 **3.3 Sensitivity analysis**

#### 4 **3.3.1 Effect of aerosols on flux deviations**

5 In preceding discussions, we focused on the effect of buildings in clear-sky condition without  
6 aerosols. Atmospheric aerosols can potentially alter the transfer of solar radiation. As  
7 described in Section 2.2, although the 3-D radiation parameterization was developed in clear-  
8 sky condition without aerosols, regression equations for  $F'_{dir}$  and  $F'_{rdif}$  can be directly applied  
9 to aerosol contaminated environment, while those for  $F'_{dif}$ ,  $F'_{rdif}$ , and  $F'_{coup}$  can provide a first-  
10 order estimate. Figure 2 shows hourly flux deviations between 3-D and plane-parallel at  
11 selected times (7:00, 12:00, and 17:00 BT) on April 1<sup>st</sup> with and without aerosols. The results  
12 on the other simulation days (January 1<sup>st</sup>, July 1<sup>st</sup>, and October 1<sup>st</sup>) are quite similar, and thus  
13 are not shown. In general, the inclusion of aerosols reduces the magnitude of surface flux  
14 deviations without changing the spatial pattern. This can be explained by the attenuation of  
15 total solar fluxes by aerosols across the domain. Over the urban center (Domain 2), aerosols  
16 reduce the magnitude of daily average deviations by about 15–30%. The reduction ratios are  
17 significantly higher in the early morning and late afternoon (40–65%) than at noon (10–25%),  
18 mainly due to higher aerosol optical depths in the early morning/late afternoon. In this study,  
19 interactions between buildings and aerosols are not considered in the simulation. For example,  
20 photons reflected by buildings can further be scattered/absorbed by aerosols, and vice versa.  
21 Given that diffuse-reflected and coupled fluxes are much smaller than direct flux, the resulting  
22 errors should be minor. The 3-D Monte Carlo photon tracing program is needed in order to  
23 achieve a more accurate evaluation of the effect of aerosols on flux deviations.

#### 24 **3.3.2 Sensitivity of flux deviations to spatial resolutions**

25 As demonstrated in Section 3.1, the magnitude of flux deviations from the flat surface is quite  
26 sensitive to spatial resolutions. Over urban areas, hourly deviations are  $\pm 1\text{--}10 \text{ W m}^{-2}$  at 800-m  
27 resolution and within  $\pm 1 \text{ W m}^{-2}$  at 4-km resolution. The smaller values in coarser grids can be  
28 explained by the compensation effect of positive and negative deviations on the opposite side  
29 of buildings. Judging from the right panel of Fig. 1, an  $800 \times 800 \text{ m}^2$  grid still covers quite a  
30 few buildings, which motivates us to explore the potential effect of buildings at even finer  
31 resolutions. As a test case, we present a rough estimate of flux deviations at a 3 arc-second

1 (about 90 m) resolution (shown in Fig. 6) by applying the 3-D radiation parameterization to 3  
2 arc-second topography data derived from SRTM. Theoretically, the parameterization may not  
3 be applicable to a spatial resolution less than about 1 km with good accuracy (Lee et al., 2013).  
4 The reason is that the radiation parameterization is developed based on grid-average  
5 topographic parameters, so it is valid only if a model grid comprises a number of topographic  
6 pixels (Lee et al., 2011, 2013). Nevertheless, it suffices to provide an initial estimate for flux  
7 deviations, though results must be interpreted with care. Of course, a more accurate estimation  
8 should be made using the Monte Carlo method in future studies. Figure 6 shows that hourly  
9 deviations in 90 m grids are generally between  $\pm 5$ – $50 \text{ W m}^{-2}$ , and the maximum local  
10 deviations can reach about  $\pm 100 \text{ W m}^{-2}$ . This is notably higher than flux deviations at 800-m  
11 resolution. These results highlight the potential importance of 3-D building effects on the  
12 microscale modeling with resolutions of 1–100 m (e.g., urban dispersion models), which  
13 requires further studies.

### 14 3.3.3 Sensitivity of flux deviations to the surface albedo

15 The surface albedo used in the 3-D radiation parameterization was directly derived from  
16 WRF/CMAQ simulation results, which ranges between 0.15–0.20 and represents the typical  
17 surface albedo of urban areas. However, there is a wide variety of roofing materials with  
18 distinct albedos (Prado and Ferreira, 2005). One geoengineering proposal to ameliorate the  
19 effect of urban heat island was to use reflective roofing material or to paint existing roofs  
20 white (Jacobson and Ten Hoeve, 2012). There are also increasing numbers of buildings with  
21 glass surfaces. To evaluate the potential effect of amplified surface albedo on flux deviations  
22 from the horizontal surface, we design three sensitivity cases in which domain-wide surface  
23 albedo was uniformly increased to 0.35, 0.50, and 0.65. Figure 7 shows simulated surface  
24 solar flux deviations in a typical urban area in Domain 1 (defined as rectangle B in Fig. 1) as a  
25 function of surface albedo. We focus on urban areas in Domain 1 (4-km resolution) because it  
26 is the region where the largest relative contribution of the reflected flux is identified (see Fig.  
27 5), implying a potentially large sensitivity to surface albedo. Figure 7 shows a moderate  
28 impact of surface albedo on flux deviations during the day. The largest sensitivity occurs at  
29 summer noon, at which a large albedo of 0.65 can amplify flux deviations from 0.1– $0.4 \text{ W m}^{-2}$   
30 to about  $0.6 \text{ W m}^{-2}$ . Compared with the case of a 4-km resolution, the change in surface  
31 albedo results in a much smaller relative change in flux deviations at 800-m resolution,

1 because the relative contribution of the reflected flux is smaller at 800-m resolution (see Fig.  
2 5).

### 3 **3.4 Implications for atmospheric studies**

4 The present results have important implication for future studies. Deviations in surface solar  
5 fluxes are within  $1 \text{ W m}^{-2}$  at a 4 km or coarser resolution due to the offset of positive and  
6 negative flux deviations, therefore the effect of buildings may not be critically significant in  
7 mesoscale atmospheric models. Nevertheless, the effect can not be neglected if there is a  
8 substantially inhomogeneous subgrid-scale distribution of plants, accumulated snow, and  
9 building/road materials, etc.; in this case, subgrid-scale flux deviations may result in biased  
10 evapotranspiration, snowmelting, and heat fluxes, etc. For meso-urban models with a typical  
11 resolution of about 1 km (e.g., urbanized MM5 model, uMM5; Taha et al., 2008), the 3-D  
12 building effects become quite significant (about  $\pm 1\text{--}10 \text{ W m}^{-2}$ ). The parameterization used in  
13 this study can be readily incorporated in these models to account for 3-D building effects. As  
14 for computational fluid dynamics models (e.g., FLUENT) and urban dispersion models (e.g.,  
15 Atmospheric Dispersion Modelling System, ADMS) with resolutions of 1–100 m, this study  
16 implies that flux deviations induced by buildings might be up to  $\pm 100 \text{ W m}^{-2}$ . The large flux  
17 deviations can significantly alter local energy balance, and thus affects the spatial distribution  
18 of temperature and small-scale flows around buildings and/or through street canyons.  
19 Therefore, the 3-D building effects on solar fluxes can play a crucial role in numerical  
20 simulation of urban meteorology and air pollutant dispersion. The present 3-D radiation  
21 parameterization may not be applicable to 1–100 m resolutions. As such, a more physically-  
22 based approach directly using an appropriate 3-D Monte Carlo photon tracing program will be  
23 needed to account for 3-D building effects more precisely. Also, topography data such as the  
24 recently released SRTM datasets at a resolution of 1 arc-second (about 30 m) may also be  
25 useful for the study of 3-D building effects.

## 26 **4 Conclusions**

27 In this study, we systematically evaluated the impact of buildings on surface solar fluxes over  
28 urban Beijing using the 3-D radiation parameterization developed in our previous study in  
29 connection with the FLG radiative transfer scheme. The evaluation was conducted in two  
30 simulation domains with grid resolutions of 4 km and 800 m, representing typical resolutions  
31 for mesoscale and meso-urban models, respectively.

1 Over urban Beijing, deviations in surface solar fluxes between the 3-D radiation  
2 parameterization and the plane-parallel scheme are generally  $\pm 1\text{--}10\text{ W m}^{-2}$  at 800-m  
3 resolution and within  $\pm 1\text{ W m}^{-2}$  at 4-km resolution. Pairs of positive-negative flux deviations  
4 on different sides of buildings are resolved at 800-m resolution, while they offset each other at  
5 4-km resolution. Deviations in surface solar fluxes over urban areas are considerably smaller  
6 than those over mountainous areas using preceding grid resolutions.

7 Flux deviations over urban areas are positive around noon but negative in the early morning  
8 and late afternoon at 4-km resolution. The corresponding deviations at 800-m resolution, in  
9 contrast, show diurnal variations that are strongly dependent on the grids' relative locations to  
10 buildings. Both the magnitude and spatiotemporal variations of flux deviations are largely  
11 dominated by the direct flux.

12 With a series of sensitivity simulations, we show that atmospheric aerosols reduce the  
13 magnitude of surface flux deviations by 10–65% without changing the spatial pattern.  
14 Simulated deviations in surface fluxes are very sensitive to spatial resolution. They can  
15 potentially reach up to  $\pm 100\text{ W m}^{-2}$  at a high resolution of about 90 m. The surface albedo has  
16 a moderate impact on flux deviations during the day, while the impact can be substantial at  
17 summer noon.

18 This study implies that the effect of buildings on surface solar fluxes may not be critically  
19 important in mesoscale atmospheric models ( $\geq 4\text{-km}$  resolution). However, the effect can play  
20 a crucial role in meso-urban atmospheric models as well as microscale urban dispersion  
21 models with resolutions of 1 m – 1 km.

22 Besides the 3-D radiation parameterization, the urban canopy models (Chen et al. 2011;  
23 Grimmond et al., 2010; Kusaka and Kimura, 2004; Martilli et al., 2002) have been frequently  
24 used in urban climate simulations to consider the building effect on solar radiation. These two  
25 models investigate the radiative effect of buildings with different methods. Below we provide  
26 a brief discussion of the differences between these two models, and their advantages and  
27 limitations. We recommend future studies be done to systematically compare these two  
28 models, and to improve current simulation of building effect on solar radiation.

29 The present 3-D radiation parameterization was developed on the basis of a 3-D Monte  
30 Carlo photon tracing approach. We parameterize the downward surface solar fluxes using the  
31 grid-average topographic information to reproduce the results in order to reduce the  
32 computational burden of 3-D Monte Carlo photon tracing calculations. In urban canopy

1 models, the radiative transfer equation was established by employing simplified, evenly  
2 spaced buildings. Then, the average building geometry parameters (e.g., building height,  
3 building width, street width, etc.) are calculated for each model grid and subsequently used in  
4 radiative transfer calculation (Chen et al. 2011; Grimmond et al., 2010; Kusaka and Kimura,  
5 2004; Martilli et al., 2002).

6 The present 3-D radiation parameterization and the commonly used urban canopy models  
7 both have their advantages and limitations. The 3-D radiation parameterization directly relates  
8 surface solar fluxes to “real” (rather than simplified) topographic data, resulting in the realistic  
9 spatiotemporal distribution of solar fluxes. In addition, the 3-D radiation parameterization  
10 treats individual flux components (i.e., the direct, diffuse, direct-reflected, diffuse-reflected,  
11 and coupled fluxes) separately taking into account the distinct feature of different flux  
12 components. However, the diffuse, diffuse-reflected, and coupled fluxes are usually  
13 oversimplified in urban canopy models (e.g. isotropic radiation is assumed).

14 The 3-D radiation parameterization also has several limitations. First, the urban topography  
15 data used in the 3-D radiation simulation cannot resolve the detailed geometry of buildings,  
16 which could introduce uncertainty in evaluating the building effect on solar fluxes. The grid  
17 resolutions used in our 3-D radiation simulation (4 km and 800 m) are considerably larger  
18 than most buildings. We found that positive and negative flux deviations on different sides of  
19 buildings often offset each other within a model grid. For this reason, the detailed geometry of  
20 buildings produces relatively minor effects on simulated solar fluxes. The effects could be  
21 much larger if we would use a grid resolution comparable to the dimension of most buildings.  
22 Future studies should be done to quantify the impact of detailed building geometry on surface  
23 solar fluxes. Second, while urban canopy models often partition total fluxes at roof, wall, and  
24 road to facilitate computations of the energy exchange at building domain, it is difficult to do  
25 similar partitioning in the 3-D radiation parameterization since complex building geometrical  
26 parameters are not resolved in the 3-D radiation parameterization.

27

28

29 **Acknowledgments.** This research was supported by the NSF under grant AGS-0946315  
30 and AGS-1523296. LRL was supported by Department of Energy Office of Science  
31 Biological and Environmental Research through the Regional and Global Climate Modeling

1 program. PNNL is operated for DOE by Battelle Memorial Institute under contract DE-AC05-  
2 76RL01830.

## 5 References

- 6 Chen, F., Kusaka, H., Bornstein, R., Ching, J., Grimmond, C., Grossman-Clarke, S., Loridan,  
7 T., Manning, K. W., Martilli, A., Shiguang, M., Sailor, D., Salamanca, F. P., Taha, H.,  
8 Tewari, M., Xuemei, W., Wyszogrodzki, A. A., and Chaolin, Z.: The integrated wrf/urban  
9 modelling system: Development, evaluation, and applications to urban environmental  
10 problems, *Int J Climatol*, 31, 273-288, 10.1002/joc.2158, 2011.
- 11 Chen, Y., Hall, A., and Liou, K. N.: Application of three-dimensional solar radiative transfer  
12 to mountains, *J Geophys Res-Atmos*, 111, D21111, DOI 10.1029/2006jd007163, 2006.
- 13 Dozier, J., and Frew, J.: Rapid calculation of terrain parameters for radiation modeling from  
14 digital elevation data, *Ieee T Geosci Remote*, 28, 963-969, Doi 10.1109/36.58986, 1990.
- 15 Dubayah, R., Dozier, J., and Davis, F. W.: Topographic distribution of clear-sky radiation  
16 over the konza prairie, kansas, *Water Resour Res*, 26, 679-690, Doi 10.1029/89wr03107,  
17 1990.
- 18 Essery, R., and Marks, D.: Scaling and parametrization of clear-sky solar radiation over  
19 complex topography, *J Geophys Res-Atmos*, 112, D10122, DOI 10.1029/2006jd007650,  
20 2007.
- 21 Fu, Q., and Liou, K. N.: On the correlated k-distribution method for radiative-transfer in  
22 nonhomogeneous atmospheres, *J Atmos Sci*, 49, 2139-2156, Doi 10.1175/1520-  
23 0469(1992)049<2139:Otcdf>2.0.Co;2, 1992.
- 24 Grimmond, C. S. B., Blackett, M., Best, M. J., Barlow, J., Baik, J. J., Belcher, S. E.,  
25 Bohnenstengel, S. I., Calmet, I., Chen, F., Dandou, A., Fortuniak, K., Gouvea, M. L.,  
26 Hamdi, R., Hendry, M., Kawai, T., Kawamoto, Y., Kondo, H., Krayenhoff, E. S., Lee, S.  
27 H., Loridan, T., Martilli, A., Masson, V., Miao, S., Oleson, K., Pigeon, G., Porson, A., Ryu,  
28 Y. H., Salamanca, F., Shashua-Bar, L., Steeneveld, G. J., Tombrou, M., Voogt, J., Young,  
29 D., and Zhang, N.: The international urban energy balance models comparison project: First  
30 results from phase 1, *J Appl Meteorol Clim*, 49, 1268-1292, 10.1175/2010JAMC2354.1,  
31 2010.
- 32 Grimmond, C. S. B., Blackett, M., Best, M. J., Baik, J. J., Belcher, S. E., Beringer, J.,  
33 Bohnenstengel, S. I., Calmet, I., Chen, F., Coutts, A., Dandou, A., Fortuniak, K., Gouvea,  
34 M. L., Hamdi, R., Hendry, M., Kanda, M., Kawai, T., Kawamoto, Y., Kondo, H.,  
35 Krayenhoff, E. S., Lee, S. H., Loridan, T., Martilli, A., Masson, V., Miao, S., Oleson, K.,  
36 Ooka, R., Pigeon, G., Porson, A., Ryu, Y. H., Salamanca, F., Steeneveld, G. J., Tombrou,  
37 M., Voogt, J. A., Young, D. T., and Zhang, N.: Initial results from phase 2 of the  
38 international urban energy balance model comparison, *Int J Climatol*, 31, 244-272,  
39 10.1002/joc.2227, 2011.
- 40 Gu, Y., Farrara, J., Liou, K. N., and Mechoso, C. R.: Parameterization of cloud-radiation  
41 processes in the ucla general circulation model, *J Climate*, 16, 3357-3370, Doi  
42 10.1175/1520-0442(2003)016<3357:Pocpit>2.0.Co;2, 2003.
- 43 Gu, Y., Liou, K. N., Xue, Y., Mechoso, C. R., Li, W., and Luo, Y.: Climatic effects of  
44 different aerosol types in china simulated by the ucla general circulation model, *J Geophys*  
45 *Res-Atmos*, 111, D15201, DOI 10.1029/2005jd006312, 2006.

1 Gu, Y., Liou, K. N., Chen, W., and Liou, H.: Direct climate effect of black carbon in china  
2 and its impact on dust storms JOURNAL OF GEOPHYSICAL RESEARCH:  
3 ATMOSPHERES, 115, D00K14, DOI 10.1029/2009JD013427, 2010.

4 Gu, Y., Liou, K. N., Lee, W. L., and Leung, L. R.: Simulating 3-d radiative transfer effects  
5 over the sierra nevada mountains using wrf, Atmos Chem Phys, 12, 9965-9976,  
6 10.5194/acp-12-9965-2012, 2012.

7 Heald, C. L.: Geos-chem aerosol optics, available at  
8 [http://www.Atmos.Colostate.Edu/~heald/docs/geos\\_chem\\_optics\\_description.Pdf](http://www.Atmos.Colostate.Edu/~heald/docs/geos_chem_optics_description.Pdf), 2010.

9 Iwabuchi, H., and Kobayashi, H.: Modeling of radiative transfer in cloudy atmospheres and  
10 plant canopies using monte carlo methods. Frcgc technical report 8, 2008.

11 Jacobson, M. Z., and Ten Hoeve, J. E.: Effects of urban surfaces and white roofs on global  
12 and regional climate, J Climate, 25, 1028-1044, 10.1175/Jcli-D-11-00032.1, 2012.

13 Jarvis, A., Reuter, H. I., Nelson, A., and Guevara, E.: Hole-filled seamless srtm data v4,  
14 available at <http://srtm.Csi.Cgiar.Org>, International Centre for Tropical Agriculture, 2008.

15 Kondo, H., Genchi, Y., Kikegawa, Y., Ohashi, Y., Yoshikado, H., and Komiyama, H.:  
16 Development of a multi-layer urban canopy model for the analysis of energy consumption  
17 in a big city: Structure of the urban canopy model and its basic performance, Bound-Lay  
18 Meteorol, 116, 395-421, 10.1007/s10546-005-0905-5, 2005.

19 Kusaka, H., Kondo, H., Kikegawa, Y., and Kimura, F.: A simple single-layer urban canopy  
20 model for atmospheric models: Comparison with multi-layer and slab models, Bound-Lay  
21 Meteorol, 101, 329-358, Doi 10.1023/A:1019207923078, 2001.

22 Kusaka, H., and Kimura, F.: Coupling a single-layer urban canopy model with a simple  
23 atmospheric model: Impact on urban heat island simulation for an idealized case, J  
24 Meteorol Soc Jpn, 82, 67-80, Doi 10.2151/Jmsj.82.67, 2004.

25 Lai, Y. J., Chou, M. D., and Lin, P. H.: Parameterization of topographic effect on surface solar  
26 radiation, J Geophys Res-Atmos, 115, D01104, DOI 10.1029/2009jd012305, 2010.

27 Lee, W. L., Liou, K. N., and Hall, A.: Parameterization of solar fluxes over mountain surfaces  
28 for application to climate models, J Geophys Res-Atmos, 116, D01101, DOI  
29 10.1029/2010jd014722, 2011.

30 Lee, W. L., Liou, K. N., and Wang, C. C.: Impact of 3-d topography on surface radiation  
31 budget over the tibetan plateau, Theor Appl Climatol, 113, 95-103, 10.1007/s00704-012-  
32 0767-y, 2013.

33 Lee, W. L., Gu, Y., Liou, K. N., Leung, L. R., and Hsu, H. H.: A global model simulation for  
34 3-d radiative transfer impact on surface hydrology over the sierra nevada and rocky  
35 mountains, Atmos Chem Phys, 15, 5405-5413, 10.5194/acp-15-5405-2015, 2015.

36 Liou, K. N., Lee, W. L., and Hall, A.: Radiative transfer in mountains: Application to the  
37 tibetan plateau, Geophys Res Lett, 34, L23809, DOI 10.1029/2007gl031762, 2007.

38 Liou, K. N., Gu, Y., Leung, L. R., Lee, W. L., and Fovell, R. G.: A wrf simulation of the  
39 impact of 3-d radiative transfer on surface hydrology over the rocky mountains and sierra  
40 nevada, Atmos Chem Phys, 13, 11709-11721, 10.5194/acp-13-11709-2013, 2013.

41 Martilli, A., Clappier, A., and Rotach, M. W.: An urban surface exchange parameterisation for  
42 mesoscale models, Bound-Lay Meteorol, 104, 261-304, 10.1023/a:1016099921195, 2002.

43 Martin, R., and Heald, C. L.: Aerosol optical properties update for geos-chem v8-03-01,  
44 available at [http://wiki.Seas.Harvard.Edu/geos-chem/index.Php/aerosol\\_optical\\_properties](http://wiki.Seas.Harvard.Edu/geos-chem/index.Php/aerosol_optical_properties),  
45 2010.

46 Mayer, B., Hoch, S. W., and Whiteman, C. D.: Validating the mystic three-dimensional  
47 radiative transfer model with observations from the complex topography of arizona's  
48 meteor crater, Atmos Chem Phys, 10, 8685-8696, 10.5194/acp-10-8685-2010, 2010.



1 Oleson, K. W., Bonan, G. B., Feddema, J., Vertenstein, M., and Grimmond, C. S. B.: An  
2 urban parameterization for a global climate model. Part i: Formulation and evaluation for  
3 two cities, *J Appl Meteorol Clim*, 47, 1038-1060, 10.1175/2007JAMC1597.1, 2008.

4 Pleim, J. E., and Xiu, A.: Development and testing of a surface flux and planetary boundary  
5 layer model for application in mesoscale models, *J Appl Meteorol*, 34, 16-32, 1995.

6 Prado, R. T. A., and Ferreira, F. L.: Measurement of albedo and analysis of its influence the  
7 surface temperature of building roof materials, *Energ Buildings*, 37, 295-300,  
8 10.1016/j.enbuild.2004.03.009, 2005.

9 Preisendorfer, R. W., and Mobley, C. D.: Albedos and glitter patterns of a wind-roughened  
10 sea-surface, *J Phys Oceanogr*, 16, 1293-1316, Doi 10.1175/1520-  
11 0485(1986)016<1293:Aagpoa>2.0.Co;2, 1986.

12 Taha, H.: Episodic performance and sensitivity of the urbanized mm5 (umm5) to  
13 perturbations in surface properties in houston texas, *Bound-Lay Meteorol*, 127, 193-218,  
14 10.1007/s10546-007-9258-6, 2008.

15 Wang, S. X., Zhao, B., Cai, S. Y., Klimont, Z., Nielsen, C. P., Morikawa, T., Woo, J. H., Kim,  
16 Y., Fu, X., Xu, J. Y., Hao, J. M., and He, K. B.: Emission trends and mitigation options for  
17 air pollutants in east asia, *Atmos Chem Phys*, 14, 6571-6603, DOI 10.5194/acp-14-6571-  
18 2014, 2014.

19 Zhao, B., Wang, S. X., Wang, J. D., Fu, J. S., Liu, T. H., Xu, J. Y., Fu, X., and Hao, J. M.:  
20 Impact of national nox and so2 control policies on particulate matter pollution in china,  
21 *Atmos Environ*, 77, 453-463, DOI 10.1016/j.atmosenv.2013.05.012, 2013a.

22 Zhao, B., Wang, S. X., Liu, H., Xu, J. Y., Fu, K., Klimont, Z., Hao, J. M., He, K. B., Cofala,  
23 J., and Amann, M.: NOx emissions in china: Historical trends and future perspectives,  
24 *Atmos Chem Phys*, 13, 9869-9897, DOI 10.5194/acp-13-9869-2013, 2013b.

25  
26

# 1 Tables and figures

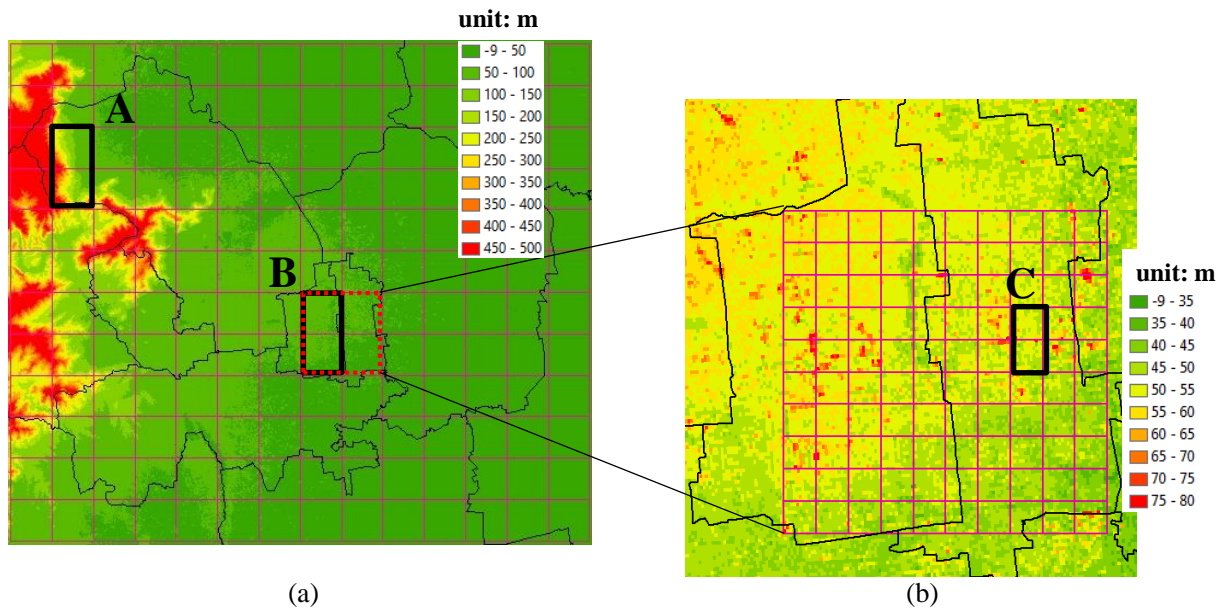

2 Figure 1. Modelling domains used in 3-D radiative transfer calculation: (a) Domain 1  
3 covering urban and suburban Beijing at a grid resolution of 4 km; (b) Domain 2 covering the  
4 urban centre of Beijing at a grid resolution of 800 m. The colours represent altitudes at a  
5 resolution of 3 arc-second (about 90 m) derived from SRTM. The black thin lines represent  
6 boundaries of districts. The three black bold rectangles (defined as A, B, and C, respectively)  
7 represent typical grids used to analyse diurnal variation and to quantify the contribution of  
8 flux components. The red dashed rectangle represents grids in Domain 1 that correspond to  
9 Domain 2.

10

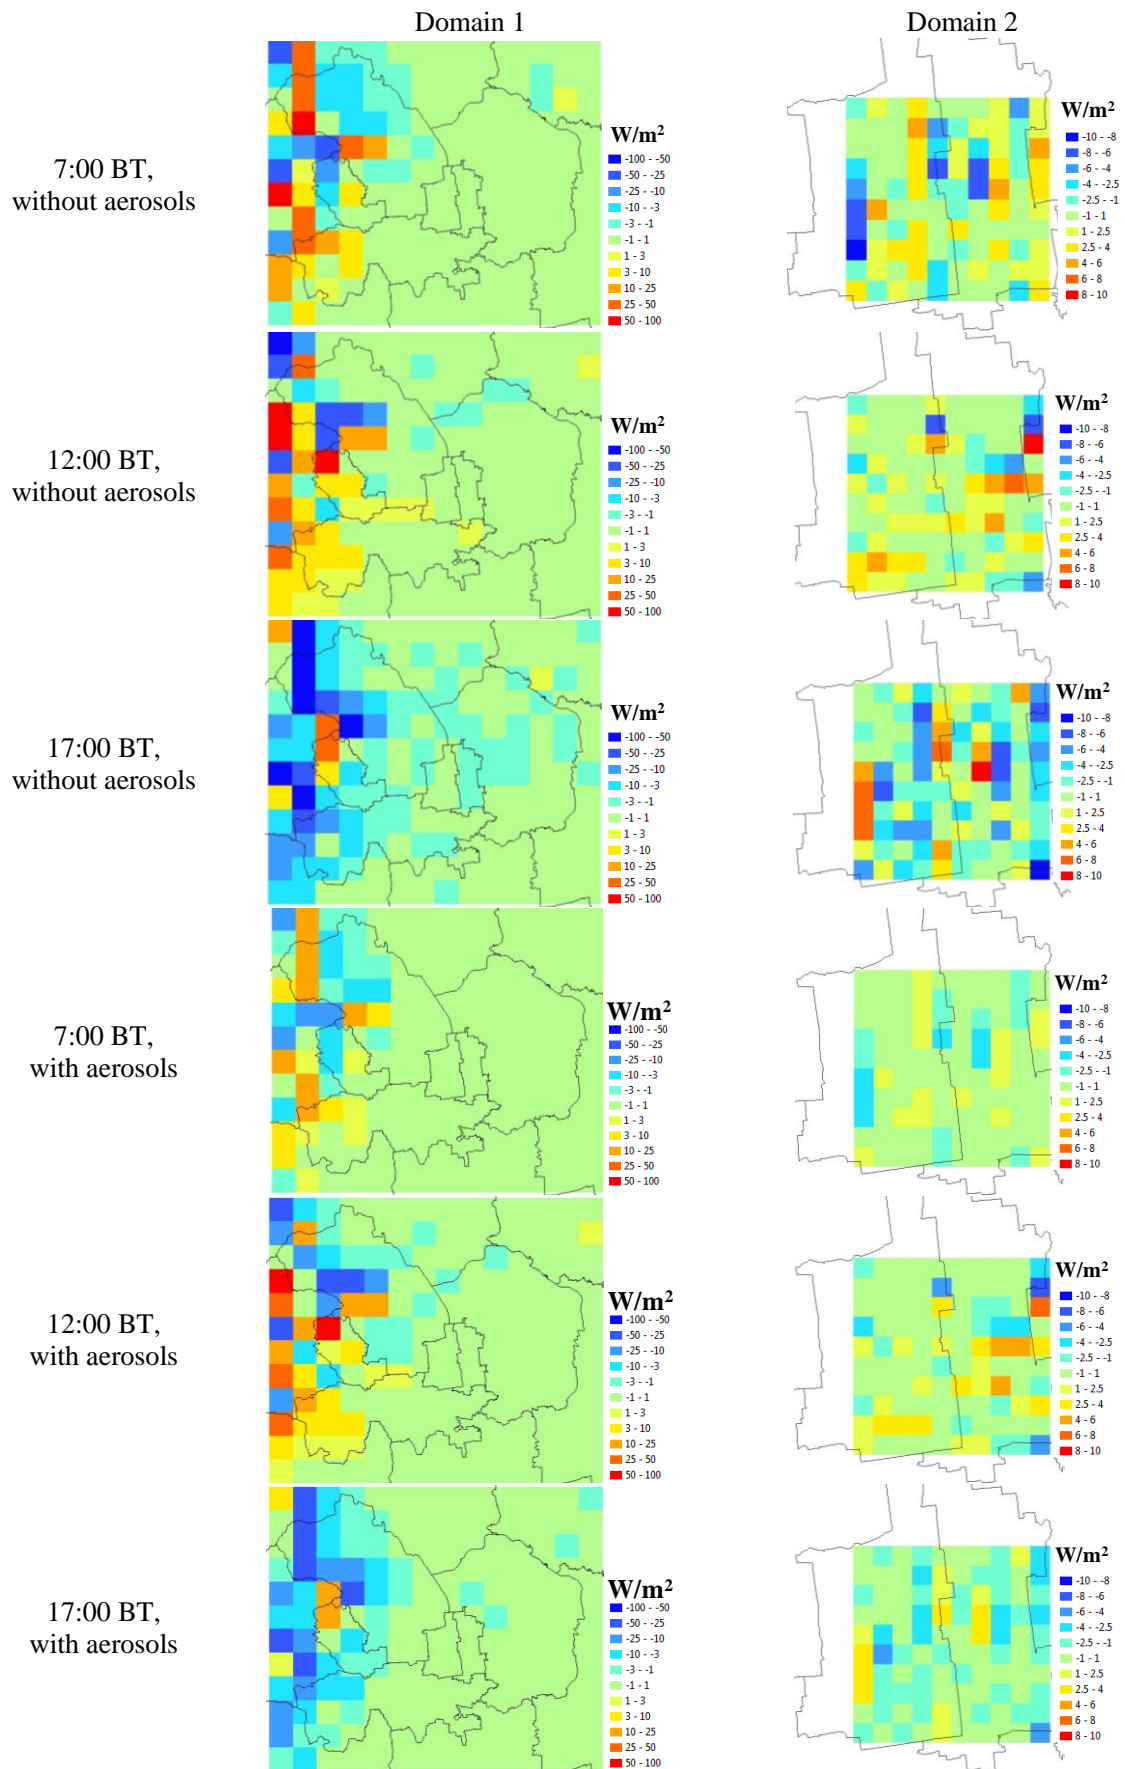

1 Figure 2. Surface solar flux deviations between the 3-D radiation parameterization and the  
 2 plane-parallel scheme at selected times (7:00, 12:00, and 17:00 BT) on April 1<sup>st</sup> in conditions  
 3 with and without aerosols.  
 4

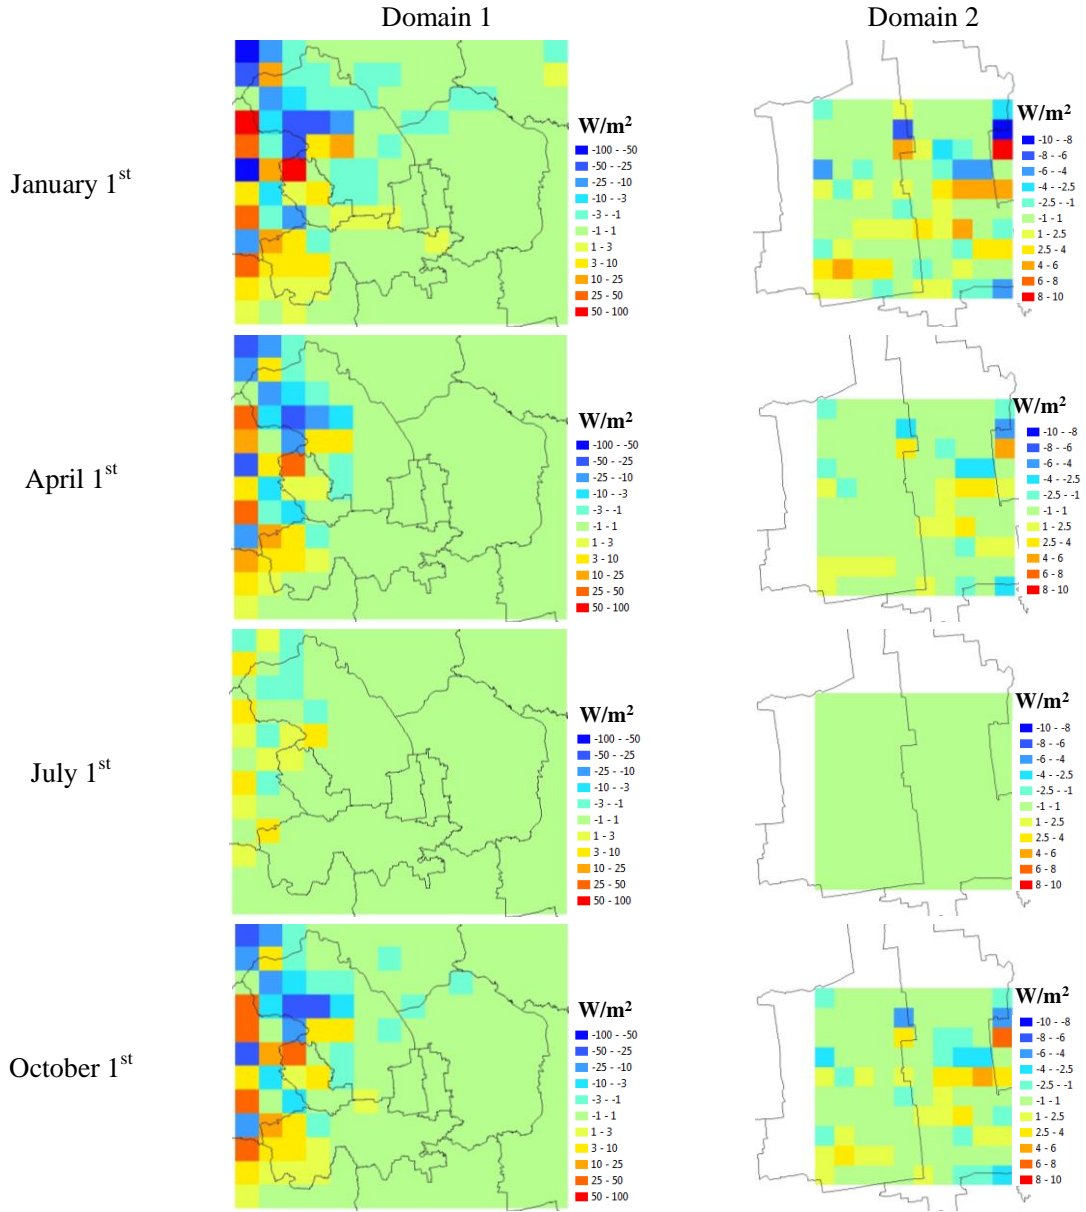

5 Figure 3. Daily average surface solar flux deviations between the 3-D radiation  
 6 parameterization and the plane-parallel scheme in clear-sky condition without aerosols on  
 7 January 1<sup>st</sup>, April 1<sup>st</sup>, July 1<sup>st</sup>, and October 1<sup>st</sup>, 2012.  
 8

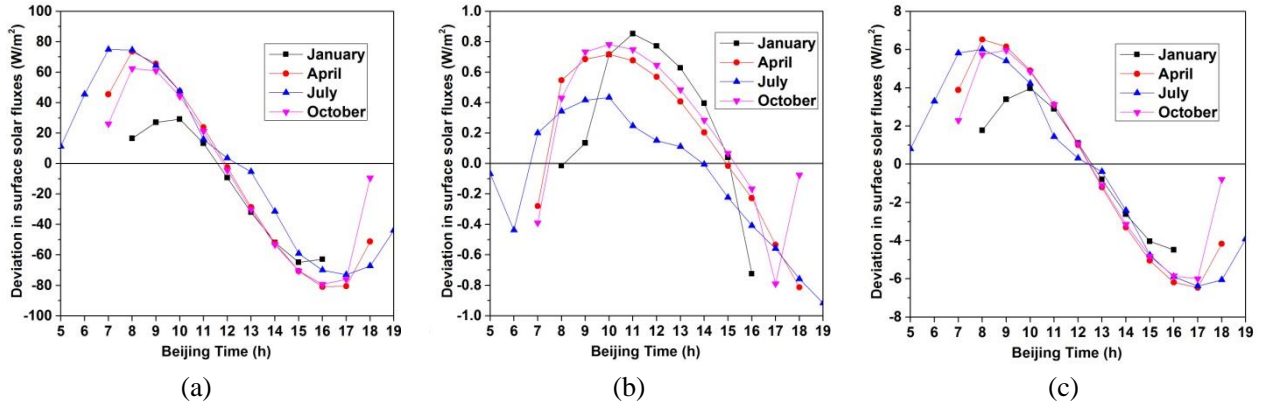

1 Figure 4. Diurnal variation of surface solar flux deviations between the 3-D radiation  
 2 parameterization and the plane-parallel scheme in clear-sky condition without aerosols in  
 3 typical grids marked by black bold rectangles in Fig. 1: (a) a typical mountainous area,  
 4 defined as rectangle A; (b) a typical urban area in Domain 1, defined as rectangle B; (c) a  
 5 typical urban area in Domain 2, defined as rectangle C.  
 6

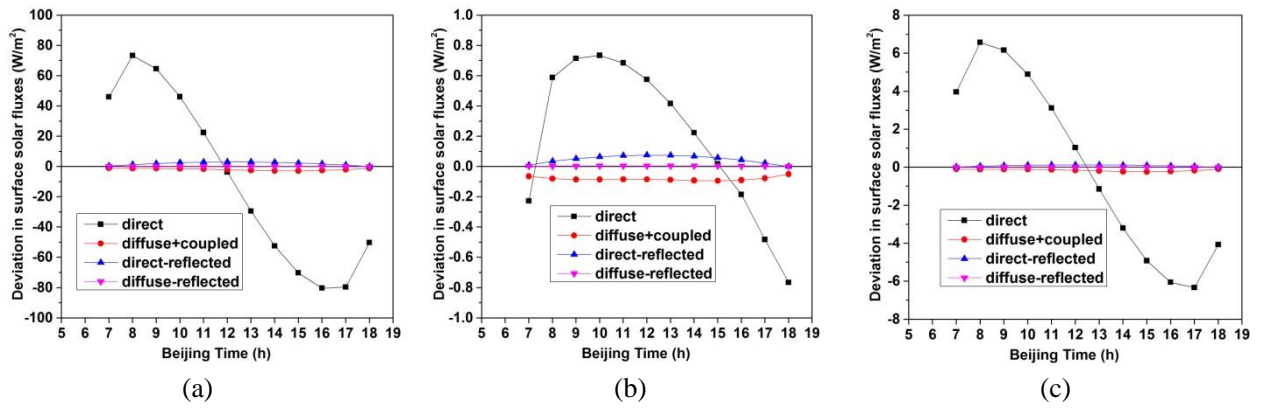

1 Figure 5. Contributions of individual components to surface solar flux deviations between the  
 2 3-D radiation parameterization and the plane-parallel scheme in clear-sky condition without  
 3 aerosols in typical grids on April 1<sup>st</sup>. Panel (a), (b), and (c) are for the same grids as Fig. 4(a),  
 4 Fig. 4(b), and Fig. 4(c).  
 5

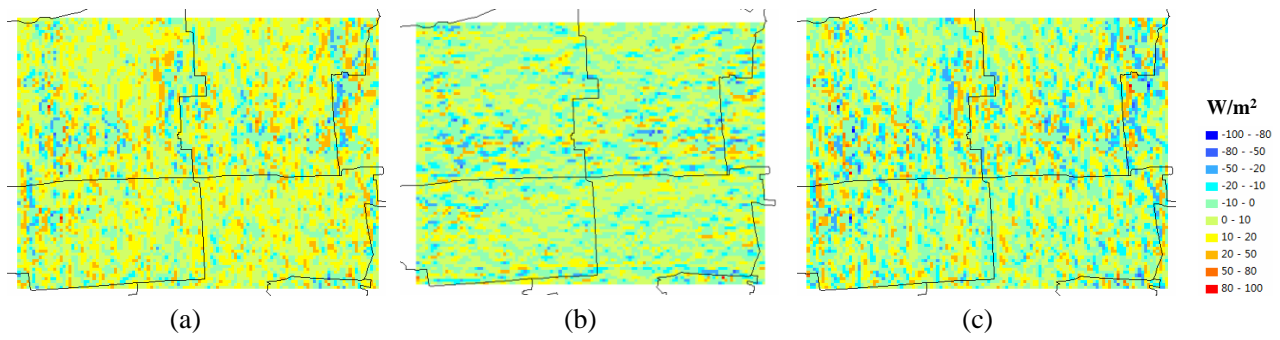

1 Figure 6. Surface solar flux deviations between the 3-D radiation parameterization and the  
 2 plane-parallel scheme on April 1<sup>st</sup> at a grid resolution of 3 arc-second (about 90 m). (a) 7:00  
 3 BT; (b) 12:00 BT; (c) 17:00 BT. The size of the simulation domain is the same as Domain 2  
 4 defined in Fig. 1. An elevation map at a 90-m resolution for the simulation domain is also  
 5 shown in the right panel of Fig. 1.

6

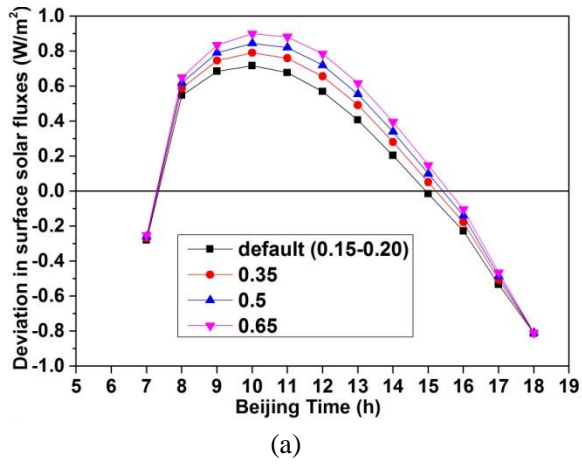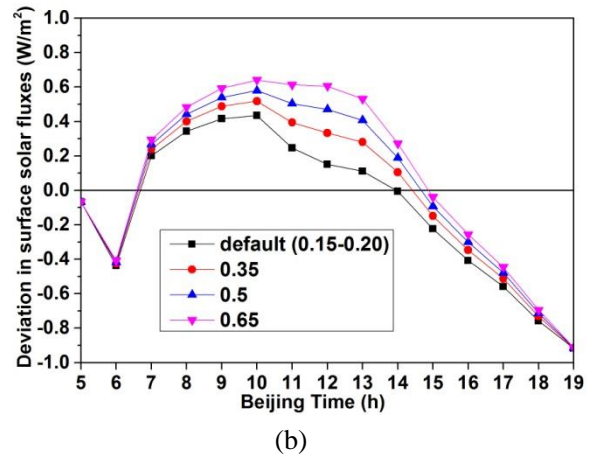

1 Figure 7. Sensitivity of surface solar flux deviations between the 3-D radiation  
 2 parameterization and the plane-parallel scheme to the surface albedo in a typical urban area in  
 3 Domain 1 (defined as rectangle B in Fig. 1) on (a) April 1<sup>st</sup>, (b) July 1<sup>st</sup>.
